# Supplementary material for: Adverse Pregnancy Outcomes and Maternal Periodontal Disease: An Overview on Meta-Analytic and Methodological Quality
Source: MDPI journal article supplement (doi:10.3390/jcm12113635), 2023-05-23
Supplement: s1 [file s1]

**An umbrella review of the evidence linking adverse pregnancy outcomes and maternal periodontal disease: from the observation to clinical intervention**

## **Online Supplemental Information**

## Supplementary data 1. PRISMA Checklist.

| Section and Topic             | Item # | Checklist item                                                                                                                                                                                                                                                                                       | Location where item is reported |
|-------------------------------|--------|------------------------------------------------------------------------------------------------------------------------------------------------------------------------------------------------------------------------------------------------------------------------------------------------------|---------------------------------|
| <b>TITLE</b>                  |        |                                                                                                                                                                                                                                                                                                      |                                 |
| Title                         | 1      | Identify the report as a systematic review.                                                                                                                                                                                                                                                          | 1                               |
| <b>ABSTRACT</b>               |        |                                                                                                                                                                                                                                                                                                      |                                 |
| Abstract                      | 2      | See the PRISMA 2020 for Abstracts checklist.                                                                                                                                                                                                                                                         | 5                               |
| <b>INTRODUCTION</b>           |        |                                                                                                                                                                                                                                                                                                      |                                 |
| Rationale                     | 3      | Describe the rationale for the review in the context of existing knowledge.                                                                                                                                                                                                                          | 7                               |
| Objectives                    | 4      | Provide an explicit statement of the objective(s) or question(s) the review addresses.                                                                                                                                                                                                               | 8                               |
| <b>METHODS</b>                |        |                                                                                                                                                                                                                                                                                                      |                                 |
| Eligibility criteria          | 5      | Specify the inclusion and exclusion criteria for the review and how studies were grouped for the syntheses.                                                                                                                                                                                          | 8-9                             |
| Information sources           | 6      | Specify all databases, registers, websites, organisations, reference lists and other sources searched or consulted to identify studies. Specify the date when each source was last searched or consulted.                                                                                            | 9                               |
| Search strategy               | 7      | Present the full search strategies for all databases, registers and websites, including any filters and limits used.                                                                                                                                                                                 | 9                               |
| Selection process             | 8      | Specify the methods used to decide whether a study met the inclusion criteria of the review, including how many reviewers screened each record and each report retrieved, whether they worked independently, and if applicable, details of automation tools used in the process.                     | 10                              |
| Data collection process       | 9      | Specify the methods used to collect data from reports, including how many reviewers collected data from each report, whether they worked independently, any processes for obtaining or confirming data from study investigators, and if applicable, details of automation tools used in the process. | 10                              |
| Data items                    | 10a    | List and define all outcomes for which data were sought. Specify whether all results that were compatible with each outcome domain in each study were sought (e.g. for all measures, time points, analyses), and if not, the methods used to decide which results to collect.                        | 10                              |
|                               | 10b    | List and define all other variables for which data were sought (e.g. participant and intervention characteristics, funding sources). Describe any assumptions made about any missing or unclear information.                                                                                         | 10                              |
| Study risk of bias assessment | 11     | Specify the methods used to assess risk of bias in the included studies, including details of the tool(s) used, how many reviewers assessed each study and whether they worked independently, and if applicable, details of automation tools used in the process.                                    | 10-11                           |
| Effect measures               | 12     | Specify for each outcome the effect measure(s) (e.g. risk ratio, mean difference) used in the synthesis or presentation of results.                                                                                                                                                                  | 10-11                           |
| Synthesis methods             | 13a    | Describe the processes used to decide which studies were eligible for each synthesis (e.g. tabulating the study intervention characteristics and comparing against the planned groups for each synthesis (item #5)).                                                                                 | 11-12                           |
|                               | 13b    | Describe any methods required to prepare the data for presentation or synthesis, such as handling of missing summary statistics, or data                                                                                                                                                             | 11-12                           |

| Section and Topic             | Item # | Checklist item                                                                                                                                                                                                                                                                       | Location where item is reported |
|-------------------------------|--------|--------------------------------------------------------------------------------------------------------------------------------------------------------------------------------------------------------------------------------------------------------------------------------------|---------------------------------|
|                               |        | conversions.                                                                                                                                                                                                                                                                         |                                 |
|                               | 13c    | Describe any methods used to tabulate or visually display results of individual studies and syntheses.                                                                                                                                                                               | 11-12                           |
|                               | 13d    | Describe any methods used to synthesize results and provide a rationale for the choice(s). If meta-analysis was performed, describe the model(s), method(s) to identify the presence and extent of statistical heterogeneity, and software package(s) used.                          | NA                              |
|                               | 13e    | Describe any methods used to explore possible causes of heterogeneity among study results (e.g. subgroup analysis, meta-regression).                                                                                                                                                 | NA                              |
|                               | 13f    | Describe any sensitivity analyses conducted to assess robustness of the synthesized results.                                                                                                                                                                                         | NA                              |
| Reporting bias assessment     | 14     | Describe any methods used to assess risk of bias due to missing results in a synthesis (arising from reporting biases).                                                                                                                                                              | NA                              |
| Certainty assessment          | 15     | Describe any methods used to assess certainty (or confidence) in the body of evidence for an outcome.                                                                                                                                                                                | 11-12                           |
| <b>RESULTS</b>                |        |                                                                                                                                                                                                                                                                                      |                                 |
| Study selection               | 16a    | Describe the results of the search and selection process, from the number of records identified in the search to the number of studies included in the review, ideally using a flow diagram.                                                                                         | 12-13                           |
|                               | 16b    | Cite studies that might appear to meet the inclusion criteria, but which were excluded, and explain why they were excluded.                                                                                                                                                          | 12                              |
| Study characteristics         | 17     | Cite each included study and present its characteristics.                                                                                                                                                                                                                            | 12-13                           |
| Risk of bias in studies       | 18     | Present assessments of risk of bias for each included study.                                                                                                                                                                                                                         | 13                              |
| Results of individual studies | 19     | For all outcomes, present, for each study: (a) summary statistics for each group (where appropriate) and (b) an effect estimate and its precision (e.g. confidence/credible interval), ideally using structured tables or plots.                                                     | 14-15                           |
| Results of syntheses          | 20a    | For each synthesis, briefly summarise the characteristics and risk of bias among contributing studies.                                                                                                                                                                               | 14-15                           |
|                               | 20b    | Present results of all statistical syntheses conducted. If meta-analysis was done, present for each the summary estimate and its precision (e.g. confidence/credible interval) and measures of statistical heterogeneity. If comparing groups, describe the direction of the effect. | NA                              |
|                               | 20c    | Present results of all investigations of possible causes of heterogeneity among study results.                                                                                                                                                                                       | NA                              |
|                               | 20d    | Present results of all sensitivity analyses conducted to assess the robustness of the synthesized results.                                                                                                                                                                           | NA                              |
| Reporting biases              | 21     | Present assessments of risk of bias due to missing results (arising from reporting biases) for each synthesis assessed.                                                                                                                                                              | NA                              |
| Certainty of evidence         | 22     | Present assessments of certainty (or confidence) in the body of evidence for each outcome assessed.                                                                                                                                                                                  | 14-15                           |
| <b>DISCUSSION</b>             |        |                                                                                                                                                                                                                                                                                      |                                 |

| Section and Topic                              | Item # | Checklist item                                                                                                                                                                                                                             | Location where item is reported |
|------------------------------------------------|--------|--------------------------------------------------------------------------------------------------------------------------------------------------------------------------------------------------------------------------------------------|---------------------------------|
| Discussion                                     | 23a    | Provide a general interpretation of the results in the context of other evidence.                                                                                                                                                          | 11                              |
|                                                | 23b    | Discuss any limitations of the evidence included in the review.                                                                                                                                                                            | 15                              |
|                                                | 23c    | Discuss any limitations of the review processes used.                                                                                                                                                                                      | 15                              |
|                                                | 23d    | Discuss implications of the results for practice, policy, and future research.                                                                                                                                                             | 17                              |
| <b>OTHER INFORMATION</b>                       |        |                                                                                                                                                                                                                                            |                                 |
| Registration and protocol                      | 24a    | Provide registration information for the review, including register name and registration number, or state that the review was not registered.                                                                                             | 16-17                           |
|                                                | 24b    | Indicate where the review protocol can be accessed, or state that a protocol was not prepared.                                                                                                                                             | 8                               |
|                                                | 24c    | Describe and explain any amendments to information provided at registration or in the protocol.                                                                                                                                            | NA                              |
| Support                                        | 25     | Describe sources of financial or non-financial support for the review, and the role of the funders or sponsors in the review.                                                                                                              | 1                               |
| Competing interests                            | 26     | Declare any competing interests of review authors.                                                                                                                                                                                         | 1                               |
| Availability of data, code and other materials | 27     | Report which of the following are publicly available and where they can be found: template data collection forms; data extracted from included studies; data used for all analyses; analytic code; any other materials used in the review. | NA                              |

From: Page MJ, McKenzie JE, Bossuyt PM, Boutron I, Hoffmann TC, Mulrow CD, et al. The PRISMA 2020 statement: an updated guideline for reporting systematic reviews. BMJ 2021;372:n71. doi: 10.1136/bmj.n71

For more information, visit: <http://www.prisma-statement.org/>

**Supplementary data 2.** List of excluded studies with justification for exclusion.

| N  |                                                                                                                                                                                                                                                                                                                                                                                                                   | Reasons to exclude            |
|----|-------------------------------------------------------------------------------------------------------------------------------------------------------------------------------------------------------------------------------------------------------------------------------------------------------------------------------------------------------------------------------------------------------------------|-------------------------------|
| 1  | Gharehghani MAM, Bayani A, Bayat AH, Hemmat M, Karimy M, Ahounbar E, Armoon B, Fakhri Y, Schroth RJ. Poor oral health-related quality of life among pregnant women: A systematic review and meta-analysis. <i>Int J Dent Hyg.</i> 2021 Feb;19(1):39-49. doi: 10.1111/idx.12465. Epub 2020 Oct 4. PMID: 32941664.                                                                                                  | Unsuitable inclusion criteria |
| 2  | Bhola S, Geddis-Regan A. Could optimising periodontal health in expectant mothers reduce the risk of babies being born prematurely? <i>Evid Based Dent.</i> 2021 Jan;22(1):14-15. doi: 10.1038/s41432-021-0149-3. PMID: 33772122.                                                                                                                                                                                 | Commentary                    |
| 3  | Turcu-Duminică, Ana; Dumitriu, Anca Silvia; Paunica, Stana; Gică, Corina; Botezatu, Radu; Gică, Nicolae; Peltecu, Gheorghe; and Panaitescu, Anca Maria (2021) "Periodontitis as a potential risk factor for premature delivery," <i>Journal of Mind and Medical Sciences</i> . Vol. 8: Iss. 1, Article 5.                                                                                                         | Review                        |
| 4  | Le QA, Eslick GD, Coulton KM, Akhter R, Condous G, Eberhard J, Nanan R. Does Treatment of Gingivitis During Pregnancy Improve Pregnancy Outcomes? A Systematic Review and Meta-Analysis. <i>Oral Health Prev Dent.</i> 2021 Jan 7;19(1):565-572. doi: 10.3290/j.ohpd.b2183059. PMID: 34673848.                                                                                                                    | Gingivitis treatment          |
| 5  | Favero V, Bacci C, Volpato A, Bandiera M, Favero L, Zanette G. Pregnancy and Dentistry: A Literature Review on Risk Management during Dental Surgical Procedures. <i>Dent J (Basel).</i> 2021 Apr 19;9(4):46. doi: 10.3390/dj9040046. PMID: 33921608; PMCID: PMC8072957.                                                                                                                                          | Review                        |
| 6  | Jakovljevic A, Slijivancanin Jakovljevic T, Duncan HF, Nagendrababu V, Jacimovic J, Aminoshariae A, Milasin J, Dummer PMH. The association between apical periodontitis and adverse pregnancy outcomes: a systematic review. <i>Int Endod J.</i> 2021 Sep;54(9):1527-1537. doi: 10.1111/iej.13538. Epub 2021 May 28. PMID: 33908039.                                                                              | Unrelated                     |
| 7  | Florou P, Anagnostis P, Theocharis P, Chourdakis M, Goulis DG. Does coenzyme Q10 supplementation improve fertility outcomes in women undergoing assisted reproductive technology procedures? A systematic review and meta-analysis of randomized-controlled trials. <i>J Assist Reprod Genet.</i> 2020 Oct;37(10):2377-2387. doi: 10.1007/s10815-020-01906-3. Epub 2020 Aug 7. PMID: 32767206; PMCID: PMC7550497. | No clinical measures          |
| 8  | Tefiku U, Popovska M, Cana A, Zendeli-Bedxeti L, Recica B, Spasovska-Gjorgovska A, Spasovski S. Determination of the Role of <i>Fusobacterium Nucleatum</i> in the Pathogenesis in and Out the Mouth. <i>Pril (Makedon Akad Nauk Umet Odd Med Nauki).</i> 2020 Jun 1;41(1):87-99. doi: 10.2478/prilozi-2020-0026. PMID: 32573481.                                                                                 | Unrelated                     |
| 9  | Matei A, Saccone G, Vogel JP, Armson AB. Primary and secondary prevention of preterm birth: a review of systematic reviews and ongoing randomized controlled trials. <i>Eur J Obstet Gynecol Reprod Biol.</i> 2019 May;236:224-239. doi: 10.1016/j.ejogrb.2018.12.022. Epub 2019 Jan 25. PMID: 30772047.                                                                                                          | Umbrella Review               |
| 10 | Bett JVS, Batistella EA, Melo G, Munhoz EA, Silva CAB, Guerra ENDS, Porporatti AL, De Luca Canto G. Prevalence of oral mucosal disorders during pregnancy: A systematic review and meta-analysis. <i>J Oral Pathol Med.</i> 2019 Apr;48(4):270-277. doi: 10.1111/jop.12831. Epub 2019 Feb 12. PMID: 30673134.                                                                                                     | No clinical measures          |
| 11 | Abou El Fadl R, Blair M, Hassounah S. Integrating Maternal and Children's Oral Health Promotion into Nursing and Midwifery Practice- A Systematic Review. <i>PLoS One.</i> 2016 Nov 23;11(11):e0166760. doi: 10.1371/journal.pone.0166760. PMID: 27880790; PMCID: PMC5120808.                                                                                                                                     | No clinical measures          |
| 12 | Vanterpool SF, Tomsin K, Reyes L, Zimmermann LJ, Kramer BW, Been JV. Risk of adverse pregnancy outcomes in women with periodontal disease and the effectiveness of interventions in decreasing this risk: protocol for systematic overview of systematic reviews. <i>Syst Rev.</i> 2016 Feb 1;5:16. doi: 10.1186/s13643-016-0195-7. PMID: 26832150; PMCID: PMC4735974.                                            | Systematic review protocol    |
| 13 | Jiang H, Xiong X. Periodontitis may be Associated with Gestational Diabetes Mellitus but not Affirmatively. <i>J Evid Based Dent Pract.</i> 2016 Jun;16(2):121-3. doi: 10.1016/j.jebdp.2016.06.001. Epub 2016 Jun 4. PMID: 27449842.                                                                                                                                                                              | Commentary                    |
| 14 | Vamos CA, Thompson EL, Avendano M, Daley EM, Quinonez RB, Boggess K. Oral health promotion interventions during pregnancy: a systematic review. <i>Community Dent Oral Epidemiol.</i> 2015 Oct;43(5):385-96. doi: 10.1111/cdoe.12167. Epub 2015 May 8. PMID: 25959402.                                                                                                                                            | Unrelated                     |
| 15 | Gambhir RS, Nirola A, Gupta T, Sekhon TS, Anand S. Oral health knowledge and awareness among pregnant women in India: A systematic review. <i>J Indian Soc</i>                                                                                                                                                                                                                                                    | Unrelated                     |

|    |                                                                                                                                                                                                                                                                                                                                                                                                                        |                                        |
|----|------------------------------------------------------------------------------------------------------------------------------------------------------------------------------------------------------------------------------------------------------------------------------------------------------------------------------------------------------------------------------------------------------------------------|----------------------------------------|
|    | Periodontol. 2015 Nov-Dec;19(6):612-7. doi: 10.4103/0972-124X.162196. PMID: 26941509; PMCID: PMC4753703.                                                                                                                                                                                                                                                                                                               |                                        |
| 16 | López NJ, Uribe S, Martínez B. Effect of periodontal treatment on preterm birth rate: a systematic review of meta-analyses. Periodontol 2000. 2015 Feb;67(1):87-130. doi: 10.1111/prd.12073. PMID: 25494599.                                                                                                                                                                                                           | Umbrella review                        |
| 17 | Schwendicke F, Karimbux N, Allareddy V, Gluud C. Periodontal treatment for preventing adverse pregnancy outcomes: a meta- and trial sequential analysis. PLoS One. 2015 Jun 2;10(6):e0129060. doi: 10.1371/journal.pone.0129060. PMID: 26035835; PMCID: PMC4452791.                                                                                                                                                    | Data from a previous systematic review |
| 18 | Condylis B, Le Borgne H, Demoersman J, Campard G, Philippe HJ, Soueidan A. Intérêt du dépistage et du traitement des maladies parodontales chez la femme enceinte: revue de la littérature [Interest of periodontitis screening and treatment in pregnancy: systematic review]. J Gynecol Obstet Biol Reprod (Paris). 2013 Oct;42(6):511-7. French. doi: 10.1016/j.jgyn.2012.05.012. Epub 2012 Jun 27. PMID: 22743065. | Umbrella review                        |
| 19 | Niederman R. Pregnancy gingivitis and causal inference. Evid Based Dent. 2013 Dec;14(4):107-8. doi: 10.1038/sj.ebd.6400966. PMID: 24357820.                                                                                                                                                                                                                                                                            | Commentary                             |
| 20 | Figueró E, Carrillo-de-Albornoz A, Martín C, Tobías A, Herrera D. Effect of pregnancy on gingival inflammation in systemically healthy women: a systematic review. J Clin Periodontol. 2013 May;40(5):457-73. doi: 10.1111/jcpe.12053. PMID: 23557432.                                                                                                                                                                 | Unrelated                              |
| 21 | Michalowicz BS, Gustafsson A, Thumbygere-Math V, Buhlin K. The effects of periodontal treatment on pregnancy outcomes. J Clin Periodontol. 2013 Apr;40 Suppl 14:S195-208. doi: 10.1111/jcpe.12081. PMID: 23627329.                                                                                                                                                                                                     | Review                                 |
| 22 | Xiong X, Buekens P, Goldenberg RL, Offenbacher S, Qian X. Optimal timing of periodontal disease treatment for prevention of adverse pregnancy outcomes: before or during pregnancy? Am J Obstet Gynecol. 2011 Aug;205(2):111.e1-6. doi: 10.1016/j.ajog.2011.03.017. Epub 2011 Mar 16. PMID: 21620355.                                                                                                                  | Data from a previous systematic review |
| 23 | Ishaque S, Yakoob MY, Imdad A, Goldenberg RL, Eisele TP, Bhutta ZA. Effectiveness of interventions to screen and manage infections during pregnancy on reducing stillbirths: a review. BMC Public Health. 2011 Apr 13;11 Suppl 3(Suppl 3):S3. doi: 10.1186/1471-2458-11-S3-S3. PMID: 21501448; PMCID: PMC3231903.                                                                                                      | Review                                 |
| 24 | Polyzos NP, Polyzos IP, Zavos A, Valachis A, Mauri D, Papanikolaou EG, Tzioras S, Weber D, Messinis IE. Obstetric outcomes after treatment of periodontal disease during pregnancy: systematic review and meta-analysis. BMJ. 2010 Dec 29;341:c7017. doi: 10.1136/bmj.c7017. PMID: 21190966; PMCID: PMC3011371.                                                                                                        | Commentary                             |
| 25 | George A, Johnson M, Blinkhorn A, Ellis S, Bhole S, Ajwani S. Promoting oral health during pregnancy: current evidence and implications for Australian midwives. J Clin Nurs. 2010 Dec;19(23-24):3324-33. doi: 10.1111/j.1365-2702.2010.03426.x. Epub 2010 Oct 19. PMID: 20955483.                                                                                                                                     | Unrelated                              |
| 26 | Honest H, Forbes CA, Durée KH, Norman G, Duffy SB, Tsourapas A, Roberts TE, Barton PM, Jowett SM, Hyde CJ, Khan KS. Screening to prevent spontaneous preterm birth: systematic reviews of accuracy and effectiveness literature with economic modelling. Health Technol Assess. 2009 Sep;13(43):1-627. doi: 10.3310/hta13430. PMID: 19796569.                                                                          | Unrelated                              |
| 27 | Menezes EV, Yakoob MY, Soomro T, Haws RA, Darmstadt GL, Bhutta ZA. Reducing stillbirths: prevention and management of medical disorders and infections during pregnancy. BMC Pregnancy Childbirth. 2009 May 7;9 Suppl 1(Suppl 1):S4. doi: 10.1186/1471-2393-9-S1-S4. PMID: 19426467; PMCID: PMC2679410.                                                                                                                | Review                                 |
| 28 | Manau C, Echeverría A, Agueda A, Guerrero A, Echeverría JJ. Periodontal disease definition may determine the association between periodontitis and pregnancy outcomes. J Clin Periodontol. 2008 May;35(5):385-97. doi: 10.1111/j.1600-051X.2008.01222.x. Epub 2008 Mar 12. PMID: 18341599.                                                                                                                             | Unrelated                              |
| 29 | Nugent JL, Baker PN. Periodontal disease and adverse pregnancy outcomes: a systematic review. BJOG. 2006 Jul;113(7):848; author reply 848-9. doi: 10.1111/j.1471-0528.2006.00969.x. Epub 2006 Jun 2. PMID: 16753047.                                                                                                                                                                                                   | Commentary                             |

### Supplementary data 3. Characteristics of the included studies.

| Author (Year), Country                             | Journal Type                   | Search Period                   | Guideline | ROB tool(s)                   | APOs                                                                                                                                                                                | Periodontal outcome   | N of included studies                | ES          | ES (95% CI)                                                                                                      | ES type                                                                                        | MA Evidence                                                                                                                                                         | Random-Effects (P< 10 <sup>-6</sup> ) | Random-Effects (P< 10 <sup>-3</sup> ) | 95% CI excluded the null value          | I <sup>2</sup>                                                  | FSN           | AMSTAR Score   |
|----------------------------------------------------|--------------------------------|---------------------------------|-----------|-------------------------------|-------------------------------------------------------------------------------------------------------------------------------------------------------------------------------------|-----------------------|--------------------------------------|-------------|------------------------------------------------------------------------------------------------------------------|------------------------------------------------------------------------------------------------|---------------------------------------------------------------------------------------------------------------------------------------------------------------------|---------------------------------------|---------------------------------------|-----------------------------------------|-----------------------------------------------------------------|---------------|----------------|
| Merchant et al. (2022) [1], Columbia               | Medical Journal   Reproduction | From October 2016 to March 2022 | PRISMA    | ROB-2                         | PTB (<37 weeks); LBW (<2,500 g)                                                                                                                                                     | Periodontal treatment | 12; 8                                | RR          | 0.77 (0.58; 1.03); 0.66 (0.47; 0.93)                                                                             | Binary                                                                                         | Suggestive; Weak                                                                                                                                                    | No; No                                | Yes; No                               | Yes; Yes                                | 79,98; 56,51                                                    | 3; 10         | Critically Low |
| Zhang et al. (2022) [2], China                     | Medical Journal   General      | Up to December 2020             | PRISMA    | NOS                           | PTB (<37 weeks); LBW (<2,500 g); SGA                                                                                                                                                | Periodontal disease   | 15; 14; 4                            | OR          | 1.57 (1.39; 1.77); 2.39 (1.69; 3.38); 1.62 (0.8.6; 3.07)                                                         | Binary                                                                                         | Suggestive; Suggestive; Non-significant                                                                                                                             | No; No; No                            | Yes; Yes; No                          | Yes; Yes; No                            | 7,9; 82,1; 57,5                                                 | 278; 112      | Critically Low |
| Le et al. (2022) [3], Australia / Canada / Vietnam | Dental Journal                 | Up to June 2020                 | PRISMA    | Cochrane Collaboration's tool | PTB (<37 weeks); LBW (<2,500 g)                                                                                                                                                     | Periodontal treatment | 11; 9; 3; 2                          | RR; OR; SMD | 0.86 (0.66;1.13); 0.80 (0.58;1.10); 0.44 (0.20;0.98); 105.36 (36.72;174.01)                                      | Binary; Binary; Binary; Continuous                                                             | Non-significant; Non-significant; Weak; Weak                                                                                                                        | No                                    | No; No; No; Yes                       | No; No; Yes; Yes                        | 49,94; 49,94; 36,1; 0                                           | -             | Critically Low |
| Porto et al. (2021) [4], Brazil                    | Medical Journal   General      | Up to April 6, 2019             | MOOSE     | NOS                           | LBW <2,500 g                                                                                                                                                                        | Periodontal disease   | 21; 16; 11                           | OR          | 2.13 (1.60;2.83)                                                                                                 | Binary                                                                                         | Highly suggestive                                                                                                                                                   | Yes                                   | Yes                                   | Yes                                     | 80,8                                                            | 188; 126; 211 | Critically Low |
| Orlandi et al. (2021) [5], United Kingdom          | Dental Journal                 | From 1946 to April 23, 2020     | PRISMA    | ROB-2                         | PTB (<37 weeks; <35 weeks; and <32 weeks); LBW (<2,500 g; and <1,500); PTB/LBW; Pre-eclampsia; SGA; Stillbirths; Perinatal mortality; Gestational age at delivery; Mean Birthweight | Periodontal treatment | 14; 4; 2; 11; 3; 3; 4; 2; 6; 8; 3; 6 | RR; SMD     | 0.77 (0.60;0.98); 0.89 (0.74;1.07); 0.83 (0.41;1.67); 0.77 (0.57;1.02); 1.02 (0.52;2.00); 0.39 (0.12;1.28); 1.00 | Binary; Binary; Binary; Binary; Binary; Binary; Binary; Binary; Binary; Continuous; Continuous | Weak; Non-significant; Non-significant; Non-significant; Non-significant; Non-significant; Non-significant; Non-significant; Non-significant; Non-significant; Non- | No                                    | No                                    | Yes; No; No; No; No; No; No; No; No; No | 67,1; 0; 55,3; 57,2; 47,6; 82,1; 6,4; 15,1; 9; 14,1; 15,1; 81,6 | 8             | Critically Low |

|                                                       |                                |                             |                   |                                                 |                                                                     |                       |                |                         |                                                                                                                                     |                                  |                                                                                                             |     |                |                   |                          |                   |                |
|-------------------------------------------------------|--------------------------------|-----------------------------|-------------------|-------------------------------------------------|---------------------------------------------------------------------|-----------------------|----------------|-------------------------|-------------------------------------------------------------------------------------------------------------------------------------|----------------------------------|-------------------------------------------------------------------------------------------------------------|-----|----------------|-------------------|--------------------------|-------------------|----------------|
|                                                       |                                |                             |                   |                                                 |                                                                     |                       |                |                         | (0.77;1.31);<br>0.90<br>(0.71;1.13);<br>0.64<br>(0.36;1.14);<br>0.85<br>(0.55;1.32);<br>0.35 (-<br>0.23;0.93); 0.14<br>(-0.17;0.45) |                                  | significant;<br>Non-<br>significant;<br>Non-<br>significant;<br>Non-<br>significant;<br>Non-<br>significant |     |                |                   |                          |                   |                |
| Moliner-Sánchez et al. (2020) [6], Spain              | Medical Journal   General      | Up to May 6, 2020           | PRISMA            | NOS                                             | PTB (<37 weeks); LBW (<2,500 g)                                     | Periodontal disease   | 11; 6; 20      | RR; OR                  | 1.67<br>(1.17;2.38);<br>2.54<br>(1.61;3.98);<br>2.01<br>(1.71;2.36)                                                                 | Binary                           | Highly suggestive;<br>Highly suggestive;<br>Strong                                                          | Yes | Yes            | Yes; Yes;<br>Yes  | 78,2;<br>59,72;<br>21,63 | 22;<br>30;<br>510 | Critically Low |
| Konopka et al. (2020) [7], Poland                     | Medical Journal   Reproduction | Until the end of March 2019 | PRISMA            | NR                                              | Pre-eclampsia                                                       | Periodontal disease   | 9              | NA                      | NA                                                                                                                                  | NA                               | NA                                                                                                          | NA  | NA             | NA                | NA                       | NA                | Critically Low |
| Manrique-Corredor et al. (2019) [8], Colombia / Spain | Dental Journal                 | Up to November 2016         | PRISMA            | Critical Appraisal Skills Program CASPe and NOS | PTB (<37 weeks)                                                     | Periodontal disease   | 20             | OR                      | 2.01<br>(1.71;2.36)                                                                                                                 | Binary                           | Strong                                                                                                      | Yes | Yes            | Yes               | 21,63                    | 510               | Critically Low |
| Bi et al. (2019) [9], Canada                          | Medical Journal   Reproduction | Up to August 12, 2019       | PRISMA            | Cochrane Collaboration's tool                   | Perinatal mortality; PTB (<37 weeks); LBW (<2,500 g)                | Periodontal treatment | 8; 8; 8        | OR; RR; Mean Difference | 0.53<br>(0.30;0.93);<br>0.78<br>(0.62;0.98);<br>200.79<br>(64.34;337.24)                                                            | Binary;<br>Binary;<br>Continuous | Weak;<br>Weak;<br>Suggestive                                                                                | No  | No, No,<br>Yes | Yes; Yes;<br>Yes  | 0; 72;<br>93             | 7; 6;<br>17       | Critically Low |
| Iheozor-Ejiofor et al. (2017) [10], United Kingdom    | Medical Journal   General      | Up to October 2016          | Cochrane Handbook | Cochrane Collaboration's tool                   | PTB (<37 weeks); LBW (<2,500 g); Perinatal mortality; Pre-eclampsia | Periodontal treatment | 11; 7; 7;<br>7 | RR                      | 0.87<br>(0.70;1.10);<br>0.67<br>(0.48;0.95);<br>0.85<br>(0.51;1.43);<br>1.10<br>(0.74;1.62)                                         | Binary                           | Non-significant;<br>Non-significant;<br>Non-significant;<br>Non-significant                                 | No  | No             | No; No;<br>No; No | 66; 59;<br>21; 27        | -                 | High           |



[illegible]

|                                            |                                |                                   |        |                               |                                                   |                       |          |                     |                                                           |                            |                                                         |     |     |               |            |             |                |
|--------------------------------------------|--------------------------------|-----------------------------------|--------|-------------------------------|---------------------------------------------------|-----------------------|----------|---------------------|-----------------------------------------------------------|----------------------------|---------------------------------------------------------|-----|-----|---------------|------------|-------------|----------------|
| Shah et al. (2013) [18], India             | Medical Journal   Reproduction | From January 2000 to October 2012 | NR     | Cochrane Collaboration's tool | PTB (<37 weeks); LBW (<2.500g); PLBW              | Periodontal treatment | 13       | NA                  | NA                                                        | NA                         | NA                                                      | NA  | NA  | NA            | NA         | NA          | Critically Low |
| Stadelmann et al. (2013) [19], Switzerland | Dental Journal                 | Up to April 12, 2012              | PRISMA | Developed by the authors      | PTB; LBW; PLBW; Pre-eclampsia                     | Periodontal disease   | 8        | NA                  | NA                                                        | NA                         | NA                                                      | NA  | NA  | NA            | NA         | NA          | Critically Low |
| Boutin et al. (2013) [20], United Kingdom  | Medical Journal   Reproduction | Up to February 2012               | PRISMA | Cochrane Collaboration's tool | PTB (<37 weeks)                                   | Periodontal treatment | 12       | RR                  | 0.89 (0.73;1.08)                                          | Binary                     | Non-significant                                         | No  | No  | No            | 52         | -           | Critically Low |
| Sgolastra et al. (2013) [21], Italy        | Medical Journal   General      | Up to March 24, 2013              | PRISMA | NOS                           | Pre-eclampsia                                     | Periodontal disease   | 15       | RR                  | 2.17 (1.38;3.41)                                          | Binary                     | Suggestive                                              | No  | Yes | Yes           | 78         | 48          | High           |
| Wei et al. (2013) [22], China              | Medical Journal   General      | Up to January 12, 2013            | NR     | NOS                           | Pre-eclampsia                                     | Periodontal disease   | 15       | RR                  | 2.79 (2.01;3.01)                                          | Binary                     | Highly suggestive                                       | Yes | Yes | Yes           | 69,75      | 194         | Critically Low |
| Rosa et al. (2012) [23], Brazil            | Medical Journal   General      | From 1980 to March 2012           | PRISMA | Developed by the authors      | PTB (<37 weeks); LBW (<2,500 g)                   | Periodontal disease   | 13; 9    | RR                  | 0.90 (0.68;1.19); 0.92 (0.71;1.20)                        | Binary                     | Non-significant; Non-significant                        | No  | No  | No; No        | 74; 56     | -           | Critically Low |
| Corbella et al. (2012) [24], Italy         | Dental Journal                 | From 1965 to January 31, 2011     | NR     | NR                            | PTB (<37 weeks); LBW (<2,500 g); PTB/LBW          | Periodontal disease   | 14; 7; 3 | OR                  | 1.78 (1.58;2.01); 1.82 (1.51;2.20); 3.00 (1.93;4.68)      | Binary                     | Highly suggestive; Highly suggestive; Highly suggestive | Yes | Yes | Yes; Yes; Yes | 82; 66; 89 | 452; 96; 24 | Critically Low |
| Kim et al. (2012) [25], USA                | Dental Journal                 | Up to September 19, 2011          | PRISMA | Cochrane Collaboration's tool | PTB (<37 weeks); LBW (<2,500 g); Mean birthweight | Periodontal treatment | 11; 8; 8 | RR; Mean Difference | 0.81 (0.64;1.02); 0.72 (0.48;1.07); 68.29 (-22.11;158.69) | Binary; Binary; Continuous | Non-significant; Non-significant; Non-significant       | No  | No  | No; No; No    | 59; 75; 80 | -           | Critically Low |

[illegible]

[illegible]

|                                     |                |                          |                   |                                     |                         |                     |    |    |    |    |    |    |    |    |    |    |                |
|-------------------------------------|----------------|--------------------------|-------------------|-------------------------------------|-------------------------|---------------------|----|----|----|----|----|----|----|----|----|----|----------------|
|                                     |                | to March 2005            |                   |                                     | SGA; GDM; Pre-eclampsia |                     |    |    |    |    |    |    |    |    |    |    |                |
| Khader et al. (2005) [41], Jordan   | Dental Journal | From 1966 to August 2002 | NR                | Margetts et al. 1995                | PTB; LBW                | Periodontal disease | 5  | NA | Critically Low |
| Scannapieco et al. (2003) [42], USA | Dental Journal | Up to October 1, 2002    | NR                | Previously reported classifications | PTB; LBW                | Periodontal disease | 12 | NA | Critically Low |
| Madianos et al. (2003) [43], USA    | Dental Journal | Up to October 2001       | Cochrane Handbook | NR                                  | PTB; LBW                | Periodontal disease | 3  | NA | Critically Low |

Abbreviations: AMSTAR - A Measurement Tool to Assess Systematic Reviews; APOs – Adverse Pregnancy Outcomes; CI – confidence interval; ES – Effect Size; FSN – Fail-Safe Number; GA – Gestational age; GDM – Gestational Diabetes Mellitus; LBW – Low Birth Weight; MA – Meta-analysis; NA – Not Applicable; NOS – Newcastle-Ottawa Scale; NR – Not Reported; OR – Odds Ratio; PL/M - pregnancy loss or miscarriage; PLBW – Preterm Low Birth Weight; PTB – Preterm Birth; PTB/LBW - Preterm Birth/ Low Birth Weight; ROB – Risk of Bias; RR – Risk Ratio; SGA – Small for Gestational Age; SMD – Standardized Mean Difference

## References

1. Merchant, A.T.; Gupta, R.D.; Akonde, M.; Reynolds, M.; Smith-Warner, S.; Liu, J.; Tarannum, F.; Beck, J.; Mattison, D. Association of Chlorhexidine Use and Scaling and Root Planing With Birth Outcomes in Pregnant Individuals With Periodontitis: A Systematic Review and Meta-Analysis. *JAMA Netw Open* **2022**, *5*, e2247632, doi:10.1001/jamanetworkopen.2022.47632.
2. Zhang, Y.; Feng, W.; Li, J.; Cui, L.; Chen, Z.-J. Periodontal Disease and Adverse Neonatal Outcomes: A Systematic Review and Meta-Analysis. *Front. Pediatr.* **2022**, *10*, 799740, doi:10.3389/fped.2022.799740.
3. Le, Q.-A.; Eslick, G.D.; Coulton, K.M.; Akhter, R.; Lain, S.; Nassar, N.; Yaacoub, A.; Condous, G.; Leonardi, M.; Eberhard, J.; et al. Differential Impact of Periodontal Treatment Strategies during Pregnancy on Perinatal Outcomes: A Systematic Review and Meta-Analysis. *Journal of Evidence-Based Dental Practice* **2022**, *22*, 101666, doi:10.1016/j.jebdp.2021.101666.
4. Porto, E.C.L.; Gomes Filho, I.S.; Batista, J.E.T.; Lyrio, A.O.; Souza, E.S.; Figueiredo, A.C.M.G.; Pereira, M.G.; Cruz, S.S. da Periodontite materna e baixo peso ao nascer: revisão sistemática e metanálise. *Ciênc. saúde coletiva* **2021**, *26*, 5383–5392, doi:10.1590/1413-812320212611.3.32362019.
5. Orlandi, M.; Muñoz Aguilera, E.; Marletta, D.; Petrie, A.; Suvan, J.; D’Aiuto, F. Impact of the Treatment of Periodontitis on Systemic Health and Quality of Life: A Systematic Review. *J Clin Periodontology* **2022**, *49*, 314–327, doi:10.1111/jcpe.13554.
6. Moliner-Sánchez, C.A.; Iranzo-Cortés, J.E.; Almerich-Silla, J.M.; Bellot-Arcís, C.; Ortolá-Siscar, J.C.; Montiel-Company, J.M.; Almerich-Torres, T. Effect of per Capita Income on the Relationship between Periodontal Disease during Pregnancy and the Risk of Preterm Birth and Low Birth Weight Newborn. Systematic Review and Meta-Analysis. *IJERPH* **2020**, *17*, 8015, doi:10.3390/ijerph17218015.
7. Konopka, T.; Zakrzewska, A. Periodontitis and Risk for Preeclampsia — a Systematic Review. *Ginekol Pol* **2020**, *91*, 158–164, doi:10.5603/GP.2020.0024.
8. Manrique-Corredor, E.J.; Orozco-Beltran, D.; Lopez-Pineda, A.; Quesada, J.A.; Gil-Guillen, V.F.; Carratala-Munuera, C. Maternal Periodontitis and Preterm Birth: Systematic Review and Meta-analysis. *Community Dent Oral Epidemiol* **2019**, *47*, 243–251, doi:10.1111/cdoe.12450.
9. Bi, W.G.; Emami, E.; Luo, Z.-C.; Santamaria, C.; Wei, S.Q. Effect of Periodontal Treatment in Pregnancy on Perinatal Outcomes: A Systematic Review and Meta-Analysis. *The Journal of Maternal-Fetal & Neonatal Medicine* **2021**, *34*, 3259–3268, doi:10.1080/14767058.2019.1678142.
10. Iheozor-Ejiofor, Z.; Middleton, P.; Esposito, M.; Glenny, A.-M. Treating Periodontal Disease for Preventing Adverse Birth Outcomes in Pregnant Women. *Cochrane Database of Systematic Reviews* **2017**, 2017, doi:10.1002/14651858.CD005297.pub3.
11. da Silva, H.E.C.; Stefani, C.M.; de Santos Melo, N.; de Almeida de Lima, A.; Rösing, C.K.; Porporatti, A.L.; Canto, G.D.L. Effect of Intra-Pregnancy Nonsurgical Periodontal Therapy on Inflammatory Biomarkers and Adverse Pregnancy Outcomes: A Systematic Review with Meta-Analysis. *Syst Rev* **2017**, *6*, 197, doi:10.1186/s13643-017-0587-3.
12. Abariga, S.A.; Whitcomb, B.W. Periodontitis and Gestational Diabetes Mellitus: A Systematic Review and Meta-Analysis of Observational Studies. *BMC Pregnancy Childbirth* **2016**, *16*, 344, doi:10.1186/s12884-016-1145-z.
13. Corbella, S.; Taschieri, S.; Del Fabbro, M.; Francetti, L.; Weinstein, R.; Ferrazzi, E. Adverse Pregnancy Outcomes and Periodontitis: A Systematic

Review and Meta-Analysis Exploring Potential Association. *Quintessence International* **2016**, *47*, 193–204, doi:10.3290/j.qi.a34980.

14. Lima, R.P.E.; Cyrino, R.M.; de Carvalho, B. Association Between Periodontitis and Gestational Diabetes Mellitus: Systematic Review and Meta-Analysis. *Journal of Periodontology* **2015**, *16*.
15. Teshome, A.; Yitayeh, A. Relationship between Periodontal Disease and Preterm Low Birth Weight: Systematic Review. *Pan Afr Med J* **2016**, *24*, doi:10.11604/pamj.2016.24.215.8727.
16. Huang, X.; Wang, J.; Liu, J.; Hua, L.; Zhang, D.; Hu, T.; Ge, Z. Maternal Periodontal Disease and Risk of Preeclampsia: A Meta-Analysis. *J. Huazhong Univ. Sci. Technol. [Med. Sci.]* **2014**, *34*, 729–735, doi:10.1007/s11596-014-1343-8.
17. Ide, M.; Papapanou, P.N. Epidemiology of Association between Maternal Periodontal Disease and Adverse Pregnancy Outcomes – Systematic Review. *Journal of Periodontology* **2013**, *84*, S181–S194, doi:10.1902/jop.2013.134009.
18. Shah, M.; Muley, A.; Muley, P. Effect of Nonsurgical Periodontal Therapy during Gestation Period on Adverse Pregnancy Outcome: A Systematic Review. *The Journal of Maternal-Fetal & Neonatal Medicine* **2013**, *26*, 1691–1695, doi:10.3109/14767058.2013.799662.
19. Stadelmann, P.; Alessandri, R.; Eick, S.; Salvi, G.E.; Surbek, D.; Sculean, A. The Potential Association between Gingival Crevicular Fluid Inflammatory Mediators and Adverse Pregnancy Outcomes: A Systematic Review. *Clin Oral Invest* **2013**, *17*, 1453–1463, doi:10.1007/s00784-013-0952-0.
20. Boutin, A.; Demers, S.; Roberge, S.; Roy-Morency, A.; Chandad, F.; Bujold, E. Treatment of Periodontal Disease and Prevention of Preterm Birth: Systematic Review and Meta-Analysis. *Amer J Perinatol* **2012**, *30*, 537–544, doi:10.1055/s-0032-1329687.
21. Sgolastra, F.; Petrucci, A.; Severino, M.; Gatto, R.; Monaco, A. Relationship between Periodontitis and Pre-Eclampsia: A Meta-Analysis. *PLoS ONE* **2013**, *8*, e71387, doi:10.1371/journal.pone.0071387.
22. Wei, B.-J.; Chen, Y.-J.; Yu, L.; Wu, B. Periodontal Disease and Risk of Preeclampsia: A Meta-Analysis of Observational Studies. *PLoS ONE* **2013**, *8*, e70901, doi:10.1371/journal.pone.0070901.
23. Rosa, M.I. da; Pires, P.D.S.; Medeiros, L.R.; Edelweiss, M.I.; Martínez-Mesa, J. Periodontal Disease Treatment and Risk of Preterm Birth: A Systematic Review and Meta-Analysis. *Cad. Saúde Pública* **2012**, *28*, 1823–1833, doi:10.1590/S0102-311X2012001000002.
24. Corbella, S.; Taschieri, S.; Francetti, L.; De Siena, F.; Del Fabbro, M. Periodontal Disease as a Risk Factor for Adverse Pregnancy Outcomes: A Systematic Review and Meta-Analysis of Case–Control Studies. *Odontology* **2012**, *100*, 232–240, doi:10.1007/s10266-011-0036-z.
25. Kim, A.J.; Lo, A.J.; Pullin, D.A.; Thornton-Johnson, D.S.; Karimbux, N.Y. Scaling and Root Planing Treatment for Periodontitis to Reduce Preterm Birth and Low Birth Weight: A Systematic Review and Meta-Analysis of Randomized Controlled Trials. *J Periodontol* **2012**, *83*, 12.
26. Tomasz, K.; Anna, P.-S. Periodontitis and Risk of Preterm Birth and Low Birthweight – a Meta-Analysis. *Ginekol Pol.* **2012**, *8*.
27. Chambrone, L.; Guglielmetti, M.R.; Pannuti, C.M.; Chambrone, L.A. Evidence Grade Associating Periodontitis to Preterm Birth and/or Low Birth Weight: I. A Systematic Review of Prospective Cohort Studies: Periodontitis and Adverse Pregnancy Outcomes. *Journal of Clinical Periodontology* **2011**, *38*, 795–808, doi:10.1111/j.1600-051X.2011.01755.x.

28. Chambrone, L.; Pannuti, C.M.; Guglielmetti, M.R.; Chambrone, L.A. Evidence Grade Associating Periodontitis with Preterm Birth and/or Low Birth Weight: II. A Systematic Review of Randomized Trials Evaluating the Effects of Periodontal Treatment: Periodontitis and Adverse Pregnancy Outcomes. *Journal of Clinical Periodontology* **2011**, *38*, 902–914, doi:10.1111/j.1600-051X.2011.01761.x.
29. Fogacci, M.F.; Vettore, M.V.; Thomé Leão, A.T. The Effect of Periodontal Therapy on Preterm Low Birth Weight: A Meta-Analysis. *Obstetrics & Gynecology* **2011**, *117*, 153–165, doi:10.1097/AOG.0b013e3181fdebc0.
30. George, A.; Shamim, S.; Johnson, M.; Ajwani, S.; Bhole, S.; Blinkhorn, A.; Ellis, S.; Andrews, K. Periodontal Treatment during Pregnancy and Birth Outcomes: A Meta-Analysis of Randomised Trials. *International Journal of Evidence-Based Healthcare* **2011**, *9*, 122–147, doi:10.1111/j.1744-1609.2011.00210.x.
31. Kunnen, A.; Van Doormaal, J.J.; Abbas, F.; Aarnoudse, J.G.; Van Pampus, M.G.; Faas, M.M. Periodontal Disease and Pre-Eclampsia: A Systematic Review: Periodontal Disease and Pre-Eclampsia. *Journal of Clinical Periodontology* **2010**, *37*, 1075–1087, doi:10.1111/j.1600-051X.2010.01636.x.
32. Pimentel Lopes De Oliveira, G.J.; Amaral Fontanari, L.; Chaves De Souza, J.A.; Ribeiro Costa, M.; Cirelli, J.A. Effect of Periodontal Treatment on the Incidence of Preterm Delivery: A Systematic Review. *Minerva Stomatol* **2010**, *59*, 543–550.
33. Uppal, A.; Uppal, S.; Pinto, A.; Dutta, M.; Shrivatsa, S.; Dandolu, V.; Mupparapu, M. The Effectiveness of Periodontal Disease Treatment During Pregnancy in Reducing the Risk of Experiencing Preterm Birth and Low Birth Weight. *The Journal of the American Dental Association* **2010**, *141*, 1423–1434, doi:10.14219/jada.archive.2010.0104.
34. Polyzos, N.P.; Polyzos, I.P.; Mauri, D.; Tzioras, S.; Tsappi, M.; Cortinovis, I.; Casazza, G. Effect of Periodontal Disease Treatment during Pregnancy on Preterm Birth Incidence: A Metaanalysis of Randomized Trials. *American Journal of Obstetrics and Gynecology* **2009**, *200*, 225–232, doi:10.1016/j.ajog.2008.09.020.
35. Conde-Agudelo, A.; Villar, J.; Lindheimer, M. Maternal Infection and Risk of Preeclampsia: Systematic Review and Metaanalysis. *American Journal of Obstetrics and Gynecology* **2008**, *198*, 7–22, doi:10.1016/j.ajog.2007.07.040.
36. Rustveld, L.O.; Kelsey, S.F.; Sharma, R. Association Between Maternal Infections and Preeclampsia: A Systematic Review of Epidemiologic Studies. *Matern Child Health J* **2008**, *12*, 223–242, doi:10.1007/s10995-007-0224-1.
37. Vergnes, J.-N.; Sixou, M. Preterm Low Birth Weight and Maternal Periodontal Status: A Meta-Analysis. *American Journal of Obstetrics and Gynecology* **2007**, *196*, 135.e1-135.e7, doi:10.1016/j.ajog.2006.09.028.
38. Xiong, X.; Buekens, P.; Vastardis, S.; Yu, S.M. Periodontal Disease and Pregnancy Outcomes: State-of-the-Science. *Obstetrical & Gynecological Survey* **2007**, *62*, 605–615, doi:10.1097/01.ogx.0000279292.63435.40.
39. Vettore, M.V.; Lamarca, G. de A.; Leão, A.T.T.; Thomaz, F.B.; Sheiham, A.; Leal, M. do C. Periodontal Infection and Adverse Pregnancy Outcomes: A Systematic Review of Epidemiological Studies. *Cad. Saúde Pública* **2006**, *22*, 2041–2053, doi:10.1590/S0102-311X2006001000010.
40. Xiong, X.; Buekens, P.; Fraser, W.; Beck, J.; Offenbacher, S. Periodontal Disease and Adverse Pregnancy Outcomes: A Systematic Review. *BJOG: Int J O&G* **2006**, *113*, 135–143, doi:10.1111/j.1471-0528.2005.00827.x.



41. Khader, Y.S.; Ta'ani, Q. Periodontal Diseases and the Risk of Preterm Birth and Low Birth Weight: A Meta-Analysis. *J Periodontol* **2005**, *76*, 5.
42. Scannapieco, F.A.; Bush, R.B.; Paju, S. Periodontal Disease as a Risk Factor for Adverse Pregnancy Outcomes. A Systematic Review. *Annals of Periodontology* **2003**, *8*, 70–78, doi:10.1902/annals.2003.8.1.70.
43. Madianos, P.N.; Bobetsis, G.A.; Kinane, D.F. Is Periodontitis Associated with an Increased Risk of Coronary Heart Disease and Preterm and/or Low Birth Weight Births?: Periodontitis and Systemic Disease. *Journal of Clinical Periodontology* **2002**, *29*, 22–36, doi:10.1034/j.1600-051X.29.s3.2.x.

#### Supplementary Data 4. AMSTAR 2 results.

| N  | #REF!                                    | Review Quality | 1 | 2  | 3 | 4  | 5 | 6 | 7 | 8 | 9   | 10 | 11  | 12 | 13 | 14 | 15 | 16 |
|----|------------------------------------------|----------------|---|----|---|----|---|---|---|---|-----|----|-----|----|----|----|----|----|
| 1  | Merchant et al. (2022)                   | Critically Low | Y | PY | Y | N  | Y | N | N | Y | Y/Y | Y  | Y/Y | N  | Y  | Y  | Y  | Y  |
| 2  | Zhang et al. (2022)                      | Critically Low | Y | Y  | Y | N  | Y | Y | N | Y | Y/Y | N  | Y/Y | N  | N  | N  | N  | Y  |
| 3  | Le et al. (2022)                         | Critically Low | Y | PY | Y | PY | Y | Y | N | Y | Y/Y | N  | Y/Y | N  | N  | N  | N  | Y  |
| 4  | Porto et al. (2021)                      | Critically Low | Y | Y  | Y | N  | Y | Y | N | N | Y/Y | N  | Y/Y | Y  | Y  | Y  | Y  | N  |
| 5  | Orlandi et al. (2021)                    | Critically Low | N | PY | Y | N  | Y | Y | Y | Y | Y/Y | Y  | Y/Y | N  | Y  | Y  | Y  | Y  |
| 6  | Moliner-Sánchez et al. (2020)            | Critically Low | Y | PY | Y | PY | Y | Y | N | Y | Y/Y | N  | Y/Y | N  | Y  | Y  | Y  | Y  |
| 7  | Konopka et al. (2020)                    | Critically Low | Y | N  | Y | N  | Y | Y | Y | Y | N/N | N  | NA  | NA | N  | NA | NA | Y  |
| 8  | Manrique-Corredor et al. (2019)          | Critically Low | Y | PY | Y | N  | Y | Y | N | Y | Y/Y | N  | Y/Y | N  | Y  | Y  | Y  | Y  |
| 9  | Bi et al. (2019)                         | Critically Low | Y | PY | Y | PY | Y | Y | N | Y | Y/Y | N  | Y/Y | Y  | Y  | Y  | Y  | Y  |
| 10 | Iheozor-Ejiofor et al. (2017)            | High           | Y | Y  | Y | PY | Y | Y | Y | Y | Y/Y | Y  | Y/Y | Y  | Y  | Y  | Y  | Y  |
| 11 | Silva et al. (2017)                      | Critically Low | Y | PY | Y | PY | Y | Y | Y | Y | Y/Y | N  | Y/Y | Y  | Y  | Y  | Y  | Y  |
| 12 | Abariga et al. (2016)                    | Critically Low | Y | PY | Y | N  | N | Y | N | Y | Y/Y | N  | Y/Y | Y  | Y  | Y  | Y  | Y  |
| 13 | Corbella et al. (2016)                   | Low            | Y | PY | Y | PY | Y | Y | Y | Y | Y/Y | N  | Y/Y | Y  | Y  | Y  | Y  | N  |
| 14 | Esteves Lima et al. (2016)               | Moderate       | Y | Y  | Y | PY | Y | Y | Y | Y | Y/Y | N  | Y/Y | N  | Y  | Y  | Y  | Y  |
| 15 | Teshome et al. (2016)                    | Critically Low | Y | PY | Y | N  | Y | Y | N | Y | Y/Y | N  | NA  | NA | N  | NA | NA | Y  |
| 16 | Huang et al. (2014)                      | Low            | Y | Y  | Y | N  | N | Y | Y | Y | Y/Y | N  | Y/Y | Y  | Y  | Y  | Y  | Y  |
| 17 | Ide et al. (2013)                        | Critically Low | Y | N  | Y | PY | Y | Y | N | Y | N/N | N  | NA  | NA | N  | NA | NA | Y  |
| 18 | Shah et al. (2013)                       | Critically Low | Y | PY | Y | N  | Y | Y | Y | Y | Y/Y | N  | NA  | NA | N  | NA | NA | Y  |
| 19 | Stadelmann et al. (2013)                 | Critically Low | Y | N  | Y | N  | Y | Y | Y | Y | N/N | N  | NA  | NA | N  | NA | NA | Y  |
| 20 | Boutin et al. (2013)                     | Critically Low | Y | Y  | Y | PY | Y | Y | N | Y | Y/Y | N  | Y/Y | Y  | Y  | Y  | Y  | Y  |
| 21 | Sgolastra et al. (2013)                  | High           | Y | PY | Y | PY | Y | Y | Y | Y | Y/Y | N  | Y/Y | Y  | Y  | Y  | Y  | Y  |
| 22 | Wei et al. (2013)                        | Critically Low | Y | N  | Y | PY | Y | Y | Y | Y | N/N | N  | Y/Y | Y  | Y  | Y  | Y  | Y  |
| 23 | Rosa et al. (2012)                       | Critically Low | Y | PY | Y | PY | Y | Y | N | Y | Y/Y | N  | Y/Y | N  | Y  | Y  | Y  | N  |
| 24 | Corbella et al. (2012)                   | Critically Low | Y | N  | Y | N  | Y | N | N | Y | N/N | N  | Y/Y | N  | N  | N  | N  | N  |
| 25 | Kim et al. (2012)                        | Critically Low | Y | Y  | Y | PY | Y | Y | N | Y | Y/Y | N  | Y/Y | N  | Y  | Y  | Y  | Y  |
| 26 | Konopka et al. (2012)                    | Critically Low | Y | N  | Y | N  | N | N | N | Y | N/N | N  | Y/Y | Y  | Y  | Y  | Y  | N  |
| 27 | Chambrone et al. (2011) I                | High           | Y | PY | Y | Y  | Y | Y | Y | Y | Y/Y | Y  | Y/Y | N  | Y  | Y  | Y  | Y  |
| 28 | Chambrone et al. (2011) II               | High           | Y | Y  | Y | Y  | Y | Y | Y | Y | Y/Y | Y  | Y/Y | N  | Y  | Y  | Y  | Y  |
| 29 | Fogacci et al. (2011)                    | High           | Y | Y  | Y | PY | Y | Y | Y | Y | Y/Y | N  | Y/Y | Y  | Y  | Y  | Y  | Y  |
| 30 | George et al. (2011)                     | Critically Low | Y | PY | Y | N  | Y | Y | Y | Y | Y/Y | N  | Y/Y | Y  | Y  | Y  | Y  | N  |
| 31 | Kunnen et al. (2010)                     | Critically Low | Y | PY | Y | N  | Y | N | Y | Y | Y/Y | N  | Y/Y | Y  | Y  | Y  | Y  | Y  |
| 32 | Pimentel Lopes De Oliveira et al. (2010) | Critically Low | Y | N  | Y | N  | N | N | Y | Y | N/N | N  | NA  | NA | N  | NA | NA | N  |
| 33 | Uppal et al. (2010)                      | Critically Low | Y | Y  | Y | N  | Y | N | N | Y | Y/Y | N  | Y/Y | Y  | Y  | Y  | Y  | N  |

|    |                             |                |   |    |   |    |   |   |   |   |     |   |     |    |   |    |    |   |
|----|-----------------------------|----------------|---|----|---|----|---|---|---|---|-----|---|-----|----|---|----|----|---|
| 34 | Polyzos et al. (2009)       | Critically Low | Y | PY | Y | PY | Y | Y | N | Y | N/N | N | Y/Y | Y  | Y | Y  | Y  | N |
| 35 | Conde-Agudelo et al. (2008) | Critically Low | Y | PY | Y | PY | N | N | N | Y | N/N | N | Y/Y | Y  | Y | Y  | Y  | Y |
| 36 | Rustveld et al. (2008)      | Critically Low | Y | PY | Y | N  | N | N | Y | Y | N/N | N | Y/Y | N  | Y | Y  | Y  | N |
| 37 | Vergnes et al. (2007)       | Critically Low | Y | PY | Y | PY | Y | Y | N | Y | N/N | N | Y/Y | Y  | Y | Y  | Y  | N |
| 38 | Xiong et al. (2007)         | Critically Low | Y | N  | Y | N  | N | N | N | Y | N/N | N | Y/Y | N  | N | N  | N  | Y |
| 39 | Vettore et al. (2006)       | Critically Low | Y | N  | Y | N  | N | N | N | Y | N/N | N | NA  | NA | N | NA | NA | N |
| 40 | Xiong et al. (2006)         | Critically Low | Y | N  | Y | N  | N | N | N | Y | N/N | N | NA  | NA | N | NA | NA | N |
| 41 | Khader et al. (2005)        | Critically Low | Y | PY | Y | N  | Y | N | Y | Y | N/N | N | Y/Y | Y  | Y | Y  | Y  | N |
| 42 | Scannapieco et al. (2003)   | Critically Low | Y | N  | Y | N  | Y | N | N | Y | N/N | N | NA  | NA | N | NA | NA | N |
| 43 | Madianos et al. (2003)      | Critically Low | Y | N  | Y | N  | Y | N | Y | Y | N/N | N | NA  | NA | N | NA | NA | N |

N—No, Y—Yes, PY—Partial Yes. 1. Research questions and inclusion criteria? 2. Review methods established a priori? 3. Explanation of their selection literature search strategy? 4. Did the review authors use a comprehensive literature search strategy? 5. Study selection performed in duplicate? 6. Data selection performed in duplicate? 7. List of excluded studies and exclusions justified? 8. Description of the included studies in adequate detail? 9. Satisfactory technique for assessing the risk of bias (RoB)? 10. Report on the sources of funding for the studies included in the review? 11. If meta-analysis was performed, did the review authors use appropriate methods for statistical combination of results? 12. If meta-analysis was performed, did the review authors assess the potential impact of RoB? 13. RoB accounted when interpreting/discussing the results of the review? 14. Did the review authors provide a satisfactory explanation for, and discussion of, any heterogeneity observed in the results of the review? 15. If they performed quantitative synthesis, was publication bias performed? 16. Did the review authors report any potential sources of conflict of interest, including funding sources?.

**Supplementary Data 5.** Overlap of study results across systematic reviews on the association of periodontal disease with APOs.

|                              | Study Type | Scannapieco et al. (2003) | Madianos et al. (2003) | Khader et al. (2005) | Vettore et al. (2006) | Xiong et al. (2006) | Vergnes et al. (2007) | Xiong et al. (2007) | Conde-Agudelo et al. (2008) | Rustveld et al. (2008) | Kunnen et al. (2010) | Chambrone et al. (2011) I | Rosa et al. (2012) | Corbella et al. (2012) | Konopka et al. (2012) | Ide et al. (2013) | Stadelmann et al. (2013) | Sgolastra et al. (2013) | Wei et al. (2013) | Huang et al. (2014) | Abariga et al. (2016) | Corbella et al. (2016) | Esteves Lima et al. (2016) | Teshome et al. (2016) | Manrique-Corredor et al. (2019) | Moliner-Sánchez et al. (2020) | Konopka et al. (2020) | Porto et al. (2021) | Zhang et al. (2022) | Overlap % |
|------------------------------|------------|---------------------------|------------------------|----------------------|-----------------------|---------------------|-----------------------|---------------------|-----------------------------|------------------------|----------------------|---------------------------|--------------------|------------------------|-----------------------|-------------------|--------------------------|-------------------------|-------------------|---------------------|-----------------------|------------------------|----------------------------|-----------------------|---------------------------------|-------------------------------|-----------------------|---------------------|---------------------|-----------|
| Offenbacher et al. (1996)    | C/C        | X                         | X                      | X                    | X                     | X                   | X                     |                     |                             |                        |                      |                           |                    | X                      |                       |                   |                          |                         |                   |                     |                       |                        |                            | X                     |                                 |                               |                       |                     | 28,57%              |           |
| Offenbacher et al. (1998)    | C/C        | X                         | X                      |                      | X                     |                     |                       |                     |                             |                        |                      |                           |                    |                        |                       |                   | X                        |                         |                   |                     |                       |                        |                            |                       |                                 |                               |                       |                     | 14,29%              |           |
| Dasanayake et al. (1998)     | C/C        | X                         | X                      |                      |                       | X                   |                       |                     |                             |                        |                      |                           |                    |                        |                       |                   |                          | X                       |                   |                     |                       |                        |                            |                       |                                 |                               |                       |                     | 10,71%              |           |
| Dasanayake et al. (2001)     | C/C        | X                         |                        | X                    |                       |                     |                       |                     |                             |                        |                      |                           |                    |                        |                       |                   |                          |                         |                   |                     |                       |                        |                            |                       |                                 |                               |                       |                     | 7,14%               |           |
| Romero et al. (2002)         | C/C        | X                         |                        |                      |                       | X                   |                       |                     |                             |                        |                      |                           |                    |                        |                       |                   |                          |                         |                   |                     |                       |                        |                            |                       |                                 |                               |                       |                     | 7,14%               |           |
| Dasanayake (2002)            | C/C        | X                         |                        |                      |                       |                     |                       |                     |                             |                        |                      |                           |                    |                        |                       |                   |                          |                         |                   |                     |                       |                        |                            |                       |                                 |                               |                       |                     | 3,57%               |           |
| Davenport et al. (2002)      | C/C        | X                         |                        |                      | X                     | X                   |                       |                     |                             |                        |                      |                           |                    |                        |                       |                   |                          |                         |                   |                     |                       |                        |                            |                       |                                 |                               |                       |                     | 10,71%              |           |
| Jeffcoat et al. (2001)       | C          |                           | X                      | X                    | X                     | X                   |                       |                     |                             |                        |                      | X                         |                    |                        | X                     |                   |                          |                         |                   |                     |                       |                        |                            |                       |                                 |                               |                       |                     | 21,43%              |           |
| Mitchell-Lewis et al. (2001) | C/C        |                           | X                      | X                    |                       | X                   |                       | X                   |                             |                        |                      |                           |                    |                        |                       |                   |                          |                         |                   |                     |                       |                        |                            |                       |                                 |                               |                       |                     | 14,29%              |           |
| Lopez et al. (2002)          | CT         |                           |                        | X                    | X                     | X                   |                       |                     | X                           |                        |                      |                           | X                  |                        |                       |                   |                          |                         |                   |                     |                       |                        |                            |                       |                                 | X                             |                       |                     | 21,43%              |           |
| Jeffcoat et al. (2003)       | CT         |                           |                        |                      | X                     | X                   | X                     | X                   | X                           |                        |                      |                           | X                  |                        |                       |                   |                          |                         |                   |                     |                       |                        |                            |                       |                                 |                               |                       |                     | 21,43%              |           |
| Sembene et al. (2000)        | C/C        |                           |                        |                      | X                     | X                   |                       |                     |                             |                        |                      |                           |                    |                        |                       |                   |                          |                         |                   |                     |                       |                        |                            |                       |                                 |                               |                       |                     | 7,14%               |           |
| Louro et al. (2001)          | C/C        |                           |                        |                      | X                     | X                   | X                     |                     |                             |                        |                      |                           |                    |                        |                       |                   |                          |                         |                   |                     |                       |                        |                            |                       |                                 |                               |                       | X                   | 14,29%              |           |
| Cruz et al. (2005)           | C/C        |                           |                        |                      | X                     |                     |                       |                     |                             |                        |                      |                           |                    |                        |                       |                   |                          |                         |                   |                     |                       |                        |                            |                       |                                 |                               |                       | X                   | X                   | 10,71%    |
| Madianos et al. (2001)       | C/C        |                           |                        |                      | X                     |                     |                       |                     |                             |                        |                      |                           |                    |                        |                       |                   |                          |                         |                   |                     |                       |                        |                            |                       |                                 |                               |                       |                     | 3,57%               |           |
| Hasegawa et al. (2003)       | C/C        |                           |                        |                      | X                     |                     |                       |                     |                             |                        |                      |                           |                    |                        |                       |                   |                          |                         |                   |                     |                       |                        |                            |                       |                                 |                               |                       |                     | 3,57%               |           |
| Moore et al. (2004) BDJ      | C/C        |                           |                        |                      | X                     | X                   | X                     |                     |                             |                        |                      | X                         |                    |                        | X                     |                   |                          |                         |                   |                     |                       |                        |                            |                       |                                 |                               |                       | X                   | 21,43%              |           |
| Moore et al. (2005)          | C/C        |                           |                        |                      | X                     | X                   |                       |                     |                             |                        |                      |                           |                    |                        |                       | X                 |                          |                         |                   |                     |                       |                        |                            |                       |                                 |                               |                       |                     | 10,71%              |           |
| Goepfert et al. (2004)       | C/C        |                           |                        |                      | X                     | X                   | X                     |                     |                             |                        |                      |                           |                    | X                      | X                     |                   |                          |                         |                   |                     |                       | X                      |                            |                       | X                               |                               |                       |                     | 25,00%              |           |
| Jarjoura et al. (2005)       | C/C        |                           |                        |                      | X                     | X                   | X                     |                     |                             |                        |                      |                           |                    | X                      | X                     | X                 |                          |                         |                   |                     |                       | X                      |                            |                       | X                               |                               |                       |                     | 28,57%              |           |
| Moore et al. (2004)          | P/C        |                           |                        |                      | X                     |                     |                       |                     |                             |                        |                      |                           |                    |                        |                       |                   |                          |                         |                   |                     |                       |                        |                            |                       | X                               |                               |                       |                     | 7,14%               |           |
| Moreu et al. (2005)          | C/C        |                           |                        |                      | X                     |                     |                       |                     |                             |                        |                      |                           |                    |                        |                       |                   |                          |                         |                   |                     |                       |                        |                            |                       |                                 |                               |                       |                     | 3,57%               |           |
| Lunardelli & Peres (2005)    | C/C        |                           |                        |                      | X                     |                     | X                     |                     |                             |                        |                      |                           |                    |                        | X                     | X                 |                          |                         |                   |                     |                       |                        |                            |                       |                                 |                               |                       |                     | 14,29%              |           |
| Cardoso (1999)               | C/C        |                           |                        |                      | X                     |                     |                       |                     |                             |                        |                      |                           |                    |                        |                       |                   |                          |                         |                   |                     |                       |                        |                            |                       |                                 |                               |                       |                     | 3,57%               |           |
| Mookem et al. (2004)         | C/C        |                           |                        |                      | X                     | X                   | X                     |                     |                             |                        |                      |                           |                    |                        |                       |                   |                          |                         |                   |                     |                       |                        |                            |                       |                                 |                               |                       |                     | 10,71%              |           |
| Radnai et al. (2004)         | C/C        |                           |                        |                      | X                     | X                   | X                     |                     |                             |                        |                      |                           |                    | X                      |                       |                   |                          |                         |                   |                     |                       | X                      |                            |                       |                                 |                               |                       |                     | 17,86%              |           |
| Dörtbudak et al. (2005)      | C/C        |                           |                        |                      | X                     | X                   | X                     |                     |                             |                        |                      |                           |                    |                        | X                     |                   |                          |                         |                   |                     |                       |                        |                            |                       |                                 |                               |                       |                     | 14,29%              |           |
| Molitero et al. (2005)       | C/C        |                           |                        |                      | X                     |                     | X                     |                     |                             |                        |                      |                           |                    |                        | X                     |                   |                          |                         |                   |                     |                       |                        |                            | X                     |                                 |                               |                       |                     | 14,29%              |           |
| Konopka et al. (2003)        | C/C        |                           |                        |                      | X                     |                     | X                     |                     |                             |                        |                      |                           |                    |                        | X                     |                   | X                        |                         |                   |                     |                       |                        |                            |                       |                                 |                               |                       |                     | 14,29%              |           |
| Carta et al. (2004)          | C/C        |                           |                        |                      | X                     |                     |                       |                     |                             |                        |                      |                           |                    |                        |                       |                   | X                        |                         |                   |                     |                       |                        |                            |                       |                                 |                               |                       |                     | 7,14%               |           |
| Buduneli et al. (2005)       | C/C        |                           |                        |                      | X                     | X                   |                       |                     |                             |                        |                      |                           |                    |                        |                       |                   |                          |                         |                   |                     |                       |                        |                            |                       |                                 |                               |                       |                     | 7,14%               |           |
| Noack et al. (2005)          | C/C        |                           |                        |                      | X                     |                     | X                     |                     |                             |                        |                      |                           |                    |                        | X                     |                   | X                        |                         |                   |                     |                       |                        |                            |                       |                                 |                               |                       |                     | 14,29%              |           |
| Holbrook et al. (2004)       | C          |                           |                        |                      | X                     | X                   |                       |                     |                             |                        |                      |                           |                    |                        |                       |                   |                          |                         |                   |                     |                       |                        |                            |                       |                                 |                               |                       |                     | 7,14%               |           |
| Marin et al. (2005)          | C          |                           |                        |                      | X                     |                     | X                     |                     |                             |                        |                      |                           |                    | X                      |                       |                   |                          |                         |                   |                     |                       | X                      |                            |                       |                                 |                               |                       |                     | 14,29%              |           |

[illegible]

[illegible]



**Supplementary Data 6.** Overlap of study results across systematic reviews on the periodontal treatment effect on APOs.

|                                  | Study Type | Polyzos et al. (2009) | PL De Oliveira et al. (2010) | Uppal et al. (2010) | Chambrone et al. (2011) II | Fogacci et al. (2011) | George et al. (2011) | Kim et al. (2012) | Shah et al. (2013) | Boutin et al. (2013) | Iheozor-Ejirofor et al. (2017) | Silva et al. (2017) | Bi et al. (2019) | Orlandi et al. (2021) | Le et al. (2022) | Merchant et al. (2022) | Overlap % |
|----------------------------------|------------|-----------------------|------------------------------|---------------------|----------------------------|-----------------------|----------------------|-------------------|--------------------|----------------------|--------------------------------|---------------------|------------------|-----------------------|------------------|------------------------|-----------|
| Lopez et al. (2002)              | CT         |                       |                              |                     | X                          | X                     | X                    | X                 | X                  | X                    | X                              |                     | X                | X                     | X                | X                      | 73,33%    |
| Jeffcoat et al. (2003)           | CT         |                       |                              | X                   | X                          | X                     | X                    | X                 | X                  | X                    | X                              |                     | X                |                       |                  |                        | 60,00%    |
| Lopez et al. (2002)              | CT         |                       |                              | X                   |                            |                       |                      |                   |                    |                      |                                |                     |                  |                       | X                |                        | 13,33%    |
| Sadatmansouri et al. (2006)      | CT         | X                     | X                            |                     | X                          | X                     | X                    | X                 | X                  | X                    | X                              |                     | X                | X                     | X                | X                      | 86,67%    |
| Michalowicz et al. (2006)        | CT         | X                     | X                            | X                   | X                          | X                     | X                    | X                 | X                  | X                    | X                              |                     | X                |                       | X                | X                      | 86,67%    |
| López et al. (2005)              | CT         | X                     | X                            | X                   |                            |                       |                      |                   | X                  | X                    | X                              |                     | X                |                       |                  | X                      | 53,33%    |
| Offenbacher et al. (2006)        | CT         | X                     | X                            | X                   | X                          | X                     | X                    | X                 |                    | X                    | X                              | X                   | X                | X                     | X                | X                      | 93,33%    |
| Tarannum and Faizuddin (2007)    | CT         | X                     | X                            | X                   | X                          | X                     | X                    | X                 | X                  | X                    | X                              |                     | X                | X                     | X                | X                      | 93,33%    |
| Offenbacher et al. (2009)        | CT         |                       |                              | X                   | X                          | X                     | X                    | X                 | X                  | X                    | X                              |                     | X                | X                     | X                |                        | 73,33%    |
| Newnham et al. (2009)            | CT         |                       |                              | X                   | X                          | X                     | X                    | X                 | X                  | X                    | X                              |                     | X                | X                     | X                | X                      | 80,00%    |
| Gazolla et al. (2007)            | CT         |                       | X                            |                     |                            |                       |                      |                   | X                  |                      |                                |                     |                  |                       | X                |                        | 20,00%    |
| Radnai et al. (2009)             | CT         |                       | X                            | X                   | X                          | X                     | X                    | X                 | X                  |                      | X                              |                     | X                | X                     | X                | X                      | 80,00%    |
| Novak et al. (2009)              | CT         |                       |                              |                     |                            |                       |                      |                   |                    |                      |                                |                     | X                |                       | X                |                        | 13,33%    |
| Macones et al. (2010)            | CT         |                       |                              | X                   | X                          | X                     |                      | X                 | X                  | X                    | X                              |                     | X                | X                     | X                |                        | 66,67%    |
| Deppe et al. (2010)              | CT         |                       |                              |                     |                            |                       |                      |                   |                    |                      |                                |                     |                  |                       | X                |                        | 6,67%     |
| Jeffcoat et al. (2011)           | CT         |                       |                              |                     | X                          |                       |                      | X                 |                    |                      |                                |                     | X                | X                     | X                |                        | 33,33%    |
| Oliveira et al. (2011)           | CT         |                       |                              |                     | X                          |                       |                      | X                 | X                  | X                    | X                              |                     | X                | X                     | X                | X                      | 60,00%    |
| Pirie et al. (2013)              | CT         |                       |                              |                     |                            |                       |                      |                   |                    |                      | X                              | X                   | X                |                       | X                |                        | 26,67%    |
| Reddy et al. (2014)              | CT         |                       |                              |                     |                            |                       |                      |                   |                    |                      |                                |                     |                  | X                     | X                |                        | 13,33%    |
| Khainar et al. (2015)            | CT         |                       |                              |                     |                            |                       |                      |                   |                    |                      |                                | X                   |                  |                       | X                |                        | 13,33%    |
| Jannaina et al. (2015)           | CT         |                       |                              |                     |                            |                       |                      |                   |                    |                      |                                |                     |                  |                       | X                |                        | 6,67%     |
| Novak et al. (2018)              | CT         |                       |                              |                     |                            |                       |                      |                   |                    |                      |                                |                     |                  |                       | X                |                        | 6,67%     |
| Leticia et al. (2019)            | CT         |                       |                              |                     |                            |                       |                      |                   |                    |                      |                                |                     |                  |                       | X                |                        | 6,67%     |
| Weidlich et al. (2012)           | CT         |                       |                              |                     |                            |                       |                      | X                 | X                  |                      |                                |                     | X                |                       |                  |                        | 20,00%    |
| Sant'Ana et al. (2011)           | CT         |                       |                              |                     |                            |                       |                      |                   |                    |                      |                                |                     | X                |                       |                  |                        | 6,67%     |
| Farrell et al (2003)             | CT         |                       |                              |                     |                            |                       |                      |                   |                    |                      | X                              |                     | X                |                       |                  | X                      | 20,00%    |
| Herera et al (2009)              | CT         |                       |                              |                     |                            |                       |                      |                   |                    |                      | X                              |                     | X                |                       |                  | X                      | 20,00%    |
| Caneiro-Queija et al (2019)      | CT         |                       |                              |                     |                            |                       |                      |                   |                    |                      |                                |                     |                  | X                     |                  | X                      | 13,33%    |
| Penova-Veselinovic et al. (2015) | P/C        |                       |                              |                     |                            |                       |                      |                   |                    |                      |                                | X                   |                  |                       |                  |                        | 6,67%     |
| Khairnar et al (2015)            | CT         |                       |                              |                     |                            |                       |                      |                   |                    |                      |                                |                     | X                | X                     |                  |                        | 13,33%    |
| Michaelowicz et al (2006)        | CT         |                       |                              |                     |                            |                       |                      |                   |                    |                      |                                |                     |                  | X                     |                  |                        | 6,67%     |

CT – Randomized Clinical Trials; P/C – Prospective/Cohort study
